# Supplementary material
Source: PubMed Central journal article supplement (PMC2570984)
Supplement: 0808719105_0808719105SI.pdf [file 0808719105_0808719105SI.pdf]

# Supporting Information

Jin et al. 10.1073/pnas.0808719105

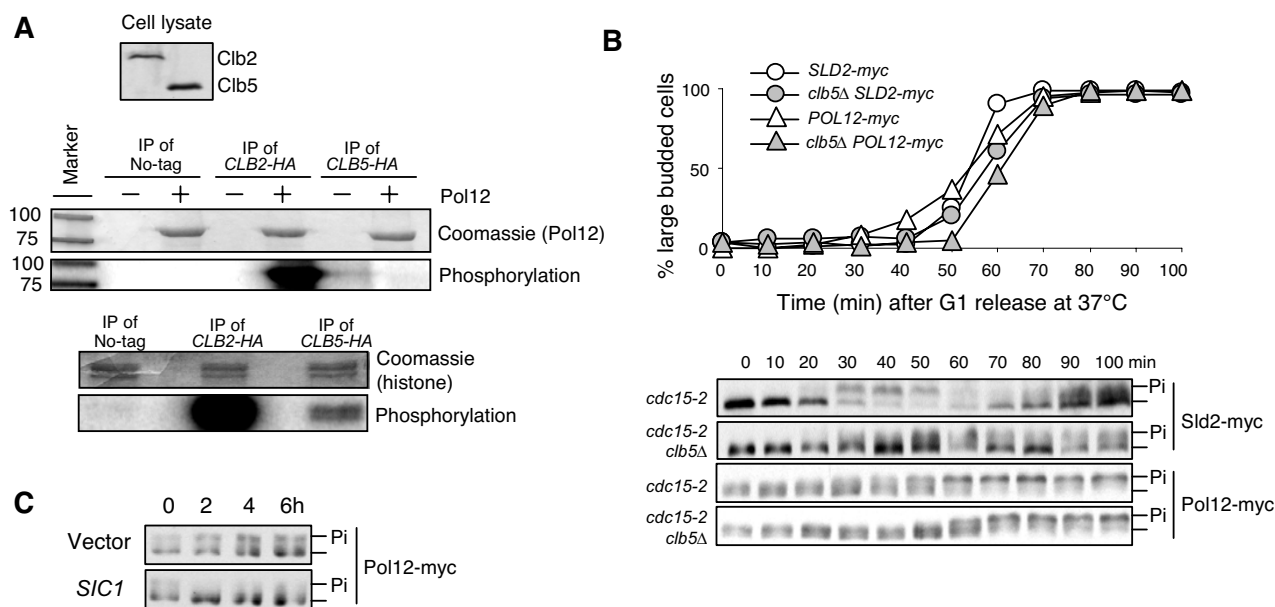

**Fig. S1.** The substrate specificity of Clb5-Cdk1 and Clb2-Cdk1. (A) The phosphorylation of Pol12 and histone by Clb5-Cdk1 and Clb2-Cdk1 *in vitro*. The cell lysates of Y300 (WT), *CLB2-HA*, and *CLB5-HA* strains were immunoprecipitated with anti-HA antibody and protein A beads. The Clb2 and Clb5 protein level before the IP is shown in the top panel. The IP beads, 5  $\mu$ g of bacteria-expressed Pol12 and 1  $\mu$ g histone protein were used for the kinase assay as described in *Material and Methods*. After SDS/PAGE, the gels were stained with coomassie blue to determine the loading of Pol12 and histone proteins. Then the gels were dried and exposed to a phosphorimager screen. The protein levels of Pol12 and histone and their phosphorylation are shown in the middle and bottom panel. (B) The phosphorylation of Sld2 and Pol12 responds differently to the absence of Clb5. Strains with indicated genotypes were arrested in G<sub>1</sub> phase and then released into cell cycle at 37°C. Cells were collected at the indicated times for protein preparation and the phosphorylation of Sld2 and Pol12 was determined after Western blotting on the basis of the band shift. (C) High levels of Cdk inhibitor Sic1 decrease Pol12 phosphorylation. Asynchronous *POL12-myc* cells with vectors or *P<sub>GAL</sub>-SIC1* plasmids were incubated in raffinose medium to mid-log phase. Galactose was added into the medium to a final concentration of 2% and cells were collected at 0, 2, 4, and 6 h. Pol12 phosphorylation was determined after Western blotting based on the band shift.

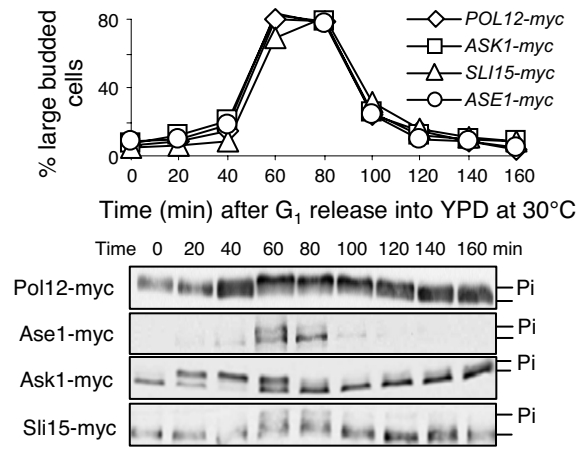

**Fig. S2.** Cell cycle-regulated phosphorylation and dephosphorylation of Pol12, Ase1, Ask1, and Sli15. G<sub>1</sub>-arrested cells were released into cell cycle at 30°C and  $\alpha$  factor was added back to block the second cell cycle. Cells were collected every 20 min to prepare protein samples and protein phosphorylation was analyzed after Western blotting.





Table S1. Yeast strains used in this study

| Strain    | Relevant genotypes                                                                           | Source      |
|-----------|----------------------------------------------------------------------------------------------|-------------|
| Y300      | <i>MATa ura3-1 his3-11, 15 leu2-3,112 trp1-1 ade2-1 can1-100</i>                             | Lab stock   |
| 133-1-3   | <i>MATa cdc15-2</i>                                                                          | Lab stock   |
| 702-5-3   | <i>MATa SLD2-9myc::LEU2</i>                                                                  | Lab stock   |
| 730-4-4   | <i>MATa cdc15-2 SLD2-9myc::LEU2</i>                                                          | This study  |
| 730-8-2   | <i>MATa cdc15-2 slk19Δ::TRP1 SLD2-9myc::LEU2</i>                                             | This study  |
| 784-16-2  | <i>MATa cdc15-2 spo12Δ::KanMX SLD2-9myc::LEU2</i>                                            | This study  |
| 689-4-2   | <i>MATa cdc55Δ::Sphis5 + SLD2-9myc::LEU2</i>                                                 | This study  |
| 764-15-2  | <i>MATa bfa1Δ::Sphis5 + SLD2-9myc::LEU2</i>                                                  | This study  |
| 769-3-2   | <i>MATa cdc14-1 SLD2-9myc::LEU2</i>                                                          | This study  |
| YYW28     | <i>MATa cdc55Δ::Sphis5+</i>                                                                  | Lab stock   |
| YFH240    | <i>MATa bfa1Δ::Sphis5+</i>                                                                   | Lab stock   |
| 395-6-3   | <i>MATa POL12-13myc::KanMX</i>                                                               | This study  |
| 745-1-2   | <i>MATa cdc15-2 POL12-13myc::KanMX</i>                                                       | This study  |
| 745-3-1   | <i>MATa cdc15-2 slk19Δ::TRP1 POL12-13myc::KanMX</i>                                          | This study  |
| 768-6-4   | <i>MATa cdc14-1 POL12-13myc::KanMX</i>                                                       | This study  |
| 446-3-3   | <i>MATa ade2 can1 his3 trp1 ura3 cdc55Δ::Sphis5 + slk19Δ::TRP1</i>                           | This study  |
| 733-4-3   | <i>MATa ade2 can1 his3 trp1 ura3 slk19Δ::TRP1</i>                                            | This study  |
| FLY63     | <i>MATa mob1-77 ura3-52 his-D200 leu2-3,112 trp1-1</i>                                       | Luca Lab    |
| 906-6-2   | <i>MATa ade2 can1 his3 trp1 ura3 bfa1Δ::Sphis5 + slk19Δ::TRP1</i>                            | This study  |
| 785-2-4   | <i>MATa spo12Δ::KanMX</i>                                                                    | This study  |
| 798-1-1   | <i>MATa cdc55Δ::Sphis5 + spo12Δ::KanMX</i>                                                   | This study  |
| 907-3-4   | <i>MATa bfa1Δ::Sphis5 + spo12Δ::KanMX</i>                                                    | This study  |
| 768-6-4   | <i>MATa cdc14-1 POL12-13myc::KanMX</i>                                                       | This study  |
| 728-1-1   | <i>MATa cdc55Δ::Sphis5 + POL12-13myc::KanMX</i>                                              | This study  |
| YYW136-1  | <i>MATa ura3-1 his3-11 15 leu2-3 112 trp1-1 ade2-1 can1-100 ASE1-13myc::Sphis5+</i>          | This study  |
| Y1113     | <i>MATa ask1Δ::LEU2 ASK1-9myc-HIS3</i>                                                       | Elledge lab |
| 746-4-1   | <i>MATa cdc15-2 ask1Δ::LEU2 ASK1-9myc-HIS3</i>                                               | This study  |
| YYW109    | <i>MATa ura3-1 his3-11 15 leu2-3, 112 trp1-1 ade2-1 can1-100 SLI15-13myc::Sphis5+</i>        | This study  |
| 782-2-2   | <i>MATa cdc15-2 SLI15-13myc::Sphis5+</i>                                                     | This study  |
| 348-1-2   | <i>MATa CLB2-HA</i>                                                                          | Lab stock   |
| 911-12-3  | <i>MATa spo12Δ::KanMX CLB2-HA</i>                                                            | This study  |
| 229-3-2   | <i>MATa CLB5-HA</i>                                                                          | Lab stock   |
| 990-5-4   | <i>MATa spo12Δ::KanMX CLB5-HA</i>                                                            | This study  |
| 870-1-2   | <i>MATa cdc15-2 TUB1-GFP::LEU2</i>                                                           | This study  |
| 870-2-2   | <i>MATa cdc15-2 slk19Δ::TRP1 TUB1-GFP::LEU2</i>                                              | This study  |
| 900-7-1   | <i>MATa cdc15-2 spo12Δ::KanMX TUB1-GFP::LEU2</i>                                             | This study  |
| 899-4-3   | <i>MATa cdc15-2 promURA::tetR::GFP::LEU2 TELV::tetOX448::URA3 NUF2-mCherry</i>               | This study  |
| 899-28-3  | <i>MATa cdc15-2 slk19Δ::TRP1 promURA::tetR::GFP::LEU2 TELV::tetOX448::URA3 NUF2-mCherry</i>  | This study  |
| 898-33-1  | <i>MATa cdc15-2 spo12Δ::KanMX promURA::tetR::GFP::LEU2 TELV::tetOX448::URA3 NUF2-mCherry</i> | This study  |
| 683-15-3  | <i>MATa MTW1-3GFP::HIS3</i>                                                                  | This study  |
| 733-2-1   | <i>MATa spo12Δ:: KanMX MTW1-3GFP::HIS3</i>                                                   | This study  |
| 920-24-1  | <i>MATa slk19Δ::TRP1 MTW1-3GFP::HIS3</i>                                                     | This study  |
| 1055-8-3  | <i>MATa cdc15-2 clb5Δ::URA3 SLD2-9myc::LEU2</i>                                              | This study  |
| 1059-5-1  | <i>MATa cdc15-2 clb5Δ::URA3 POL12-13myc::KanMX</i>                                           | This study  |
| 1062-9-4  | <i>MATa cdc15-2 clb2Δ::LEU2 POL12-13myc::KanMX</i>                                           | This study  |
| 1004-29-1 | <i>MATa CLB5Δdb SLD2-9myc::LEU2</i>                                                          | This study  |
| 1004-35-3 | <i>MATa cdc15-2 CLB5Δdb SLD2-9myc::LEU2</i>                                                  | This study  |
